# Supplementary material
Source: PubMed Central journal article supplement (PMC1924540)
Supplement: pnas_0704462104_4.pdf [file pnas_0704462104_4.pdf]

**Table 1. *pbgP* mRNA levels**

| [MgCl <sub>2</sub> ] | <i>pmrD</i> allele |                   |
|----------------------|--------------------|-------------------|
|                      | wild-type          | <i>pmrD</i> -FLAG |
| 10 $\mu$ M           | 78.1 $\pm$ 15      | 158.0 $\pm$ 6.4   |
| 10 mM                | 1.0 $\pm$ 0.12     | 2.2 $\pm$ 0.27    |
