# Supplementary material
Source: PubMed Central journal article supplement (PMC1924540)
Supplement: pnas_0704462104_5.pdf [file pnas_0704462104_5.pdf]

**Table 2. Bacterial strains and plasmids used in this study**

| Strain or plasmid                      | Description                                                                                                   | Ref. or source |
|----------------------------------------|---------------------------------------------------------------------------------------------------------------|----------------|
| <i>S. enterica</i> serovar Typhimurium |                                                                                                               |                |
| 14028s                                 | wild-type                                                                                                     | 30             |
| EG11491                                | <i>pmrD</i> ::Cm <sup>R</sup>                                                                                 | 31             |
| EG13654                                | <i>pmrD</i> -FLAG                                                                                             | 16             |
| EG14590                                | $\Delta$ <i>pmrC1.1</i>                                                                                       | 32             |
| EG17235                                | P <sub><i>pbgP</i></sub> :: <i>tetRA</i>                                                                      | This work      |
| EG17236                                | P <sub><i>ugd</i></sub> :: <i>tetRA</i>                                                                       | This work      |
| EG17238                                | P <sub><i>ugd</i></sub> :: <i>tetRA</i> -Cm <sup>R</sup>                                                      | This work      |
| EG17242                                | P <sub><i>pbgP</i></sub> (synthetic PhoP box)                                                                 | This work      |
| EG17243                                | P <sub><i>ugd</i></sub> (synthetic PhoP box)                                                                  | This work      |
| EG17343                                | P <sub><i>pbgP</i></sub> :: <i>tetRA pmrD</i> ::Cm <sup>R</sup>                                               | This work      |
| EG17344                                | P <sub><i>pbgP</i></sub> (synthetic PhoP box) <i>pmrD</i> ::Cm <sup>R</sup>                                   | This work      |
| EG17346                                | $\Delta$ <i>pmrC1.1 hisD</i> ::MudJ                                                                           | This work      |
| EG17348                                | $\Delta$ <i>pmrC1.1</i> P <sub><i>ugd</i></sub> (synthetic PhoP box)                                          | This work      |
| EG17350                                | $\Delta$ <i>pmrC1.1</i> P <sub><i>ugd</i></sub> (synthetic PhoP box) P <sub><i>pbgP</i></sub> :: <i>tetRA</i> | This work      |
| EG17352                                | $\Delta$ <i>pmrC1.1</i> P <sub><i>ugd</i></sub> (synthetic PhoP box)                                          | This work      |
|                                        | P <sub><i>pbgP</i></sub> (synthetic PhoP box) <i>pmrD</i> ::Cm <sup>R</sup>                                   |                |
| plasmid                                |                                                                                                               |                |
| pKD3                                   | rep <sub>R6K<math>\gamma</math></sub> Ap <sup>R</sup> FRT Cm <sup>R</sup> FRT                                 | 5              |
| pKD46                                  | rep <sub>pSC101</sub> ts Ap <sup>R</sup> p <sub><i>araBAD</i></sub> $\gamma$ $\beta$ <i>exo</i>               | 5              |
