# Supplementary material
Source: PubMed Central journal article supplement (PMC1924540)
Supplement: pnas_0704462104_6.pdf [file pnas_0704462104_6.pdf]

**Table 3. Primers used in construction of chromosomal mutants**

---

| ID no. | Sequence (5' to 3')                                                                             |
|--------|-------------------------------------------------------------------------------------------------|
| 6105   | TAATTCGGTTAAAAATTATCTTTTTACTTCACCTTAATTTTAAAGACCCA<br>CTTTCACATTTAAG                            |
| 6106   | TTATTTTTTAACGCATTTAGCTGAACCCTACTGGATGAAGCTAAGCA<br>CTTGTCTCCTGTTTAC                             |
| 6107   | AAAATGCCTTAAACTTTCGGCGAAAGCAAAGCATAATTCCGTTAA<br>AAATTATCTTTTTACTTCACCTTAATTGTTTAATGTTTGTTTAAAT |
| 6108   | TTTCGGCAATAGAAAAGGGCTTATTTTTTAACGCATTTAGCTGAAC<br>CCTACTGGATGAAGATTAAACAAACATTAACAATTAAGGTGAA   |
| 6111   | GCTTTTTTTTATCTCTATTCTTATTGATTTATCGCTTTTGTTAAGACCC<br>ACTTTCACATTTAAG                            |
| 6112   | AAAACAATTCAGATTATCTTCATTACGATAAACACAGATTCTAAGC<br>ACTTGTCTCCTGTTTAC                             |
| 6113   | CTGCAAAAATGTTTAAGCCCGGTTTAATACCGGGCTTTTTTTTATCT<br>CTATTCTTATTGATTTATCGCTTTTGTTTAATATTTGTTTAAAT |
| 6114   | TATAAAGTGCAACGCAGACGAAAACAATTCAGATTATCTTCATTAC<br>GATAAACACAGATTATTAACAAATATTAACAAAAGCGATAAA    |
| 6245   | CCCTCAAGCTCAGGGGAGTAAACAGGAGACAAGTGCTTAGGTGTA<br>GGCTGGAGCTGCTTC                                |
| 6255   | AAAACAATTCAGATTATCTTCATTACGATAAACACAGATTCATATG<br>AATATCCTCCTTAG                                |

---
