# Supplementary material
Source: PubMed Central journal article supplement (PMC1924540)
Supplement: pnas_0704462104_7.pdf [file pnas_0704462104_7.pdf]

**Table 4. Primers used in QRT PCR**

| Target                    | Orientation | ID no. | Sequence (5' to 3')             |
|---------------------------|-------------|--------|---------------------------------|
| <i>rrs</i>                | Forward     | 3023   | CCAGCAGCCGCGGTAAT               |
|                           | Reverse     | 3024   | TTTACGCCCAGTAATTCCGATT          |
| <i>pbgP</i>               | Forward     | 6522   | TGATGTCGGACTTTTTGCCTT           |
|                           | Reverse     | 6523   | GCTCTTCCGCGCCCAT                |
| <i>ugd</i>                | Forward     | 6524   | TGAAAATCACGATATCCGGGA           |
|                           | Reverse     | 6525   | GCAAACCATTAGACAAGCCAACA         |
| <i>pmrC</i>               | Forward     | 3007   | GCGCAATGTGCTGGTGTTTAT           |
|                           | Reverse     | 3008   | CACACTATTGACCACGCTAAACG         |
| <i>pagP</i>               | Forward     | 6526   | AGTATTTTCTTATTATTGCTCTCCTTTTGAT |
|                           | Reverse     | 6527   | GAAGGAATAGCCAGCCATGG            |
| <i>pmrD</i>               | Forward     | 6528   | TGGAATGGTTGGTTAAGAAATCG         |
|                           | Reverse     | 6529   | CATGGCACGCCCTCTTTTT             |
| <i>mgtA<sub>UTR</sub></i> | Forward     | 4443   | TAATTGCCACAAACTTATG             |
|                           | Reverse     | 4446   | TCGCGGGAGAGGGGTGGGTT            |
| <i>phoP</i>               | Forward     | 4489   | GATGAAGACGGCCTTTCCTTAA          |
|                           | Reverse     | 4490   | GAACCGGCAGTGAAACATCA            |
| <i>pcgL</i>               | Forward     | 6627   | GGCGACCGTAGTAATATCGACAA         |
|                           | Reverse     | 6628   | CTTTCCTCCTGTTCAGCCTGTT          |
| <i>slyB</i>               | Forward     | 4493   | CAAGTTCAGAATGTAACGTACGGTACT     |
|                           | Reverse     | 4494   | GAATCATCACCGCCCTGAAT            |
| <i>rstA</i>               | Forward     | 4125   | GCATGACGATATGTCGCGATT           |

|             |         |      |                             |
|-------------|---------|------|-----------------------------|
|             | Reverse | 4126 | AGCGAGGTGAGCAGGACAA         |
| <i>mgtB</i> | Forward | 7116 | TGAAAAAATTCGATGGGTCG        |
|             | Reverse | 7118 | TGA TAT TAA ACA CCT GCG CCC |

---
