# Supplementary material
Source: PubMed Central journal article supplement (PMC1924540)
Supplement: pnas_0704462104_8.pdf [file pnas_0704462104_8.pdf]

**Table 5. Parameter values for the connector-mediated pathway model fitted to the data in Fig. 3A**

| Parameter        | Value  | Parameter     | Value  |
|------------------|--------|---------------|--------|
| $k_1^{indir}$    | 0.4910 | $k_4$         | 100    |
| $k_{-1}^{indir}$ | 0.2    | $k_{-4}$      | 0.0899 |
| $k_2$            | 5.0    | $k_{23}$      | 1.0    |
| $k_{-2}$         | 0.0709 | $K_1^{indir}$ | 1.0845 |
| $k_3$            | 0.1    | $K_2$         | 0.1645 |
| $k_{-3}$         | 50     |               |        |
