# Supplementary material
Source: PubMed Central journal article supplement (PMC1924540)
Supplement: pnas_0704462104_9.pdf [file pnas_0704462104_9.pdf]

**Table 6. Parameter values for the direct regulation pathway model fitted to the data in Fig. 3A**

| Parameter      | Value  |
|----------------|--------|
| $k_1^{dir}$    | 0.0909 |
| $k_{-1}^{dir}$ | 0.0495 |
| $K_1^{dir}$    | 0.5033 |
