# Supplementary material
Source: PubMed Central journal article supplement (PMC1924540)
Supplement: pnas_0704462104_11.pdf [file pnas_0704462104_11.pdf]

## References

1. Davis RW, Botstein D, Roth JR (1980) *Advanced Bacterial Genetics* (Cold Spring Harbor Lab Press, Cold Spring Harbor).
2. Sambrook J, Fritsch EF, Maniatis T (1989) *Molecular Cloning: A Laboratory Manual* (Cold Spring Harbor Lab Press, Cold Spring Harbor).
3. Snavely MD, Miller CG, Maguire ME (1991) *J Biol Chem* 266:815-823.
4. Bochner BR, Huang HC, Schieven GL, Ames BN (1980) *J Bacteriol* 143:926-33.
5. Datsenko KA, Wanner BL (2000) *Proc Natl Acad Sci USA* 97:6640-6645.
6. Licht TR, Krogfelt KA, Cohen PS, Poulsen LK, Urbance J, Molin S (1996) *Infect Immun* 64:3811-3817.
7. Kato A, Groisman EA (2004) *Genes Dev* 18:2302-2313.
8. Shin D, Groisman EA (2005) *J Biol Chem* 280:4089-4094.
9. Wösten MMSM, Groisman EA (1999) *J Biol Chem* 274:27185-27190.
10. Perron-Savard P, De Crescenzo G, Le Moual H (2005) *Microbiology* 151:3979-3987.
11. Minagawa S, Ogasawara H, Kato A, Yamamoto K, Eguchi Y, Oshima T, Mori H, Ishihama A, Utsumi R (2003) *J Bacteriol* 185:3696-3702.
12. Mangan S, Zaslaver A, Alon U (2003) *J Mol Biol* 334:197-204.
13. Ozbudak EM, Thattai M, Lim HN, Shraiman BI, van Oudenaarden A (2004) *Nature* 427:737-740.
14. Rosenfeld N, Elowitz MB, Alon U (2002) *J Mol Biol* 323:785-793.
15. Shea MA, Ackers GK (1985) *J Mol Biol* 181:211-230.

16. Kato A, Latifi T, Groisman EA (2003) *Proc Natl Acad Sci USA* 100:4706-4711.
17. Weiss JN (1997) *FASEB J* 11:835-841.
18. Cai SJ, Inouye M (2002) *J Biol Chem* 277:24155-24161.
19. Saez-Rodriguez J, Kremling A, Conzelmann H, Bettenbrock K, Gilles ED (2004) *IEEE Control Syst Mag* 24:35-52.
20. Acerenza L, Mizraji E (1997) *Biochim Biophys Acta–Prot Struct Mol Enzymol* 1339:155-166.
21. Bluthgen N, Herzog H (2003) *J Theor Biol* 225:293-300.
22. Ferrell JE (1996) *Trends Biochem Sci* 21:460-465.
23. Ferrell JE (1997) *Trends Biochem Sci* 22:288-289.
24. Mitrophanov AY, Churchward G, Borodovsky M (2007) *J Theor Biol* 246:113-128.
25. Shin D, Lee EJ, Huang H, Groisman EA (2006) *Science* 314:1607-1609.
26. Underwood KA, Swartz JR, Puglisi JD (2005) *Biotechnol Bioeng* 91:425-435.
27. Draper DE (1996) in *Escherichia coli and Salmonella*, ed. Neidhardt FC (ASM Press, Washington, DC), Vol. 1, pp. 902-908.
28. Bernstein JA, Khodursky AB, Lin PH, Lin-Chao S, Cohen SN (2002) *Proc Natl Acad Sci USA* 99:9697-9702.
29. Kushner SR (1996) in *Escherichia coli and Salmonella*, ed. Neidhardt FC (ASM Press, Washington, DC), Vol. 1, pp. 849-860.
30. Fields PI, Swanson RV, Haidaris CG, Heffron F (1986) *Proc Natl Acad Sci USA* 83:5189-5193.
31. Kox LF, Wösten MM, Groisman EA (2000) *EMBO J* 19:1861-1872.
32. Lee H, Hsu FF, Turk J, Groisman EA (2004) *J Bacteriol* 186:4124-4133.
