# Supplementary material
Source: PubMed Central journal article supplement (PMC1924540)

**A**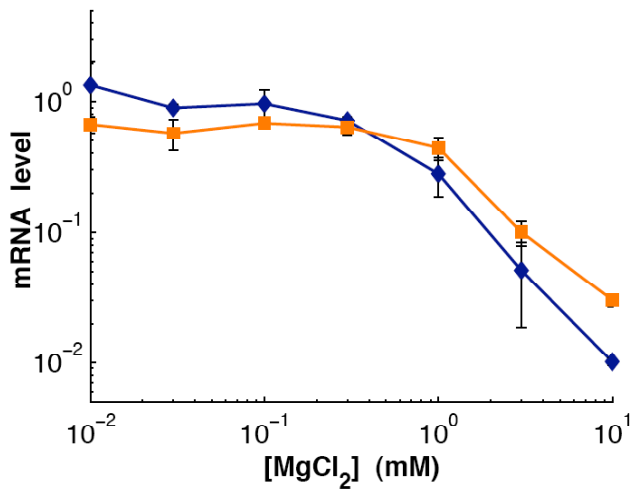**B**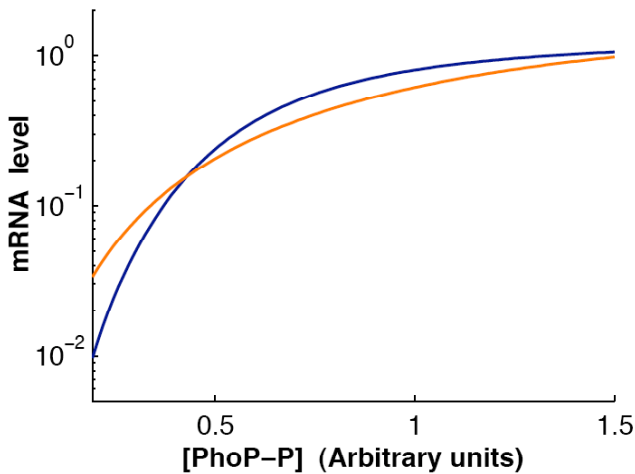

Supplement: pnas_0704462104_1.pdf [file pnas_0704462104_1.pdf]

**0    7.5    15    30    60    120    Time (min)**

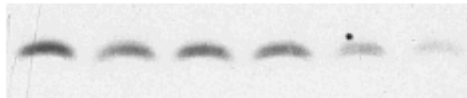

**← PmrD-FLAG**

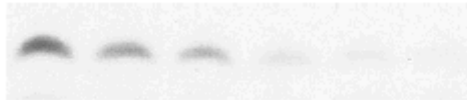

**← PmrD**

Supplement: pnas_0704462104_2.pdf [file pnas_0704462104_2.pdf]

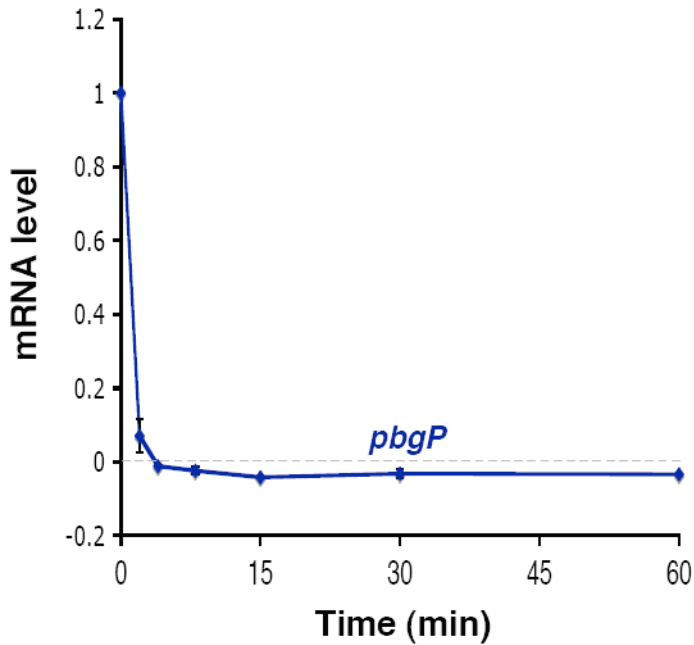

Supplement: pnas_0704462104_3.pdf [file pnas_0704462104_3.pdf]
